# Supplementary material
Source: PubMed Central journal article supplement (PMC3865103)
Supplement: NIHMS509981-supplement-10637_2013_9987_MOESM1_ESM.pdf [file NIHMS509981-supplement-10637_2013_9987_MOESM1_ESM.pdf]

## Investigational New Drugs

### Structure-Activity Relationship (SAR) of Withanolides to Inhibit Hsp90 for Its Activity in Pancreatic Cancer Cells

Mancang Gu<sup>1,2,‡</sup>, Yanke Yu<sup>1,‡</sup>, G. M. Kamal B Gunaherath<sup>3</sup>, A. A. Leslie Gunatilaka<sup>3</sup>, Dapeng Li<sup>2</sup>, Duxin Sun<sup>1\*</sup>

<sup>1</sup>Department of Pharmaceutical Sciences, College of Pharmacy, The University of Michigan, 428 Church Street, Ann Arbor, MI 48109, USA

<sup>2</sup>Department of Pharmaceutical Sciences, Zhejiang Chinese Medical University, 548 Binwen Road, Hangzhou, ZJ 310013, P.R. China

<sup>3</sup>SW Center for Natural Products Research & Commercialization, School of Natural Resources and the Environment, College of Agriculture and Life Sciences, The University of Arizona, 250 E Valencia Road, Tucson, AZ 85706-6800

E-mail: [duxins@umich.edu](mailto:duxins@umich.edu)

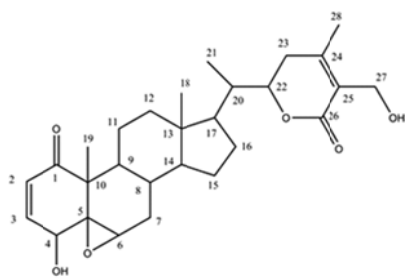

**A. Withaferin A (WA)**

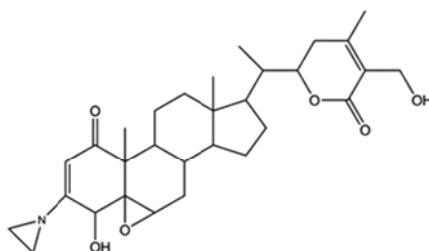

**B. 3-Aziridinylwithaferin A (AzWA)**

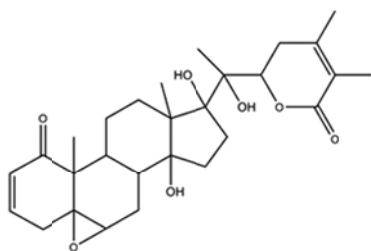

**C. Withanolide E (WE)**

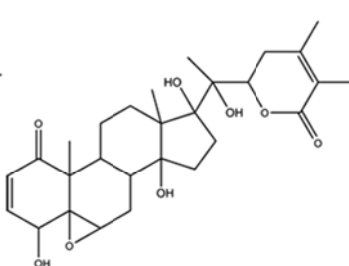

**D. 4β-Hydroxywithanolide E (HWE)**

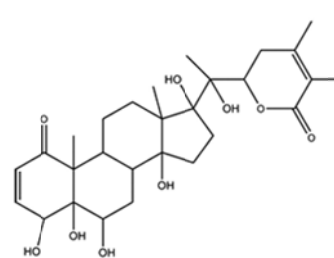

**E. Withaperuvin (WP)**

**S.1** Chemical structure of withaferin A (WA), withanolide E (WE), 4β-hydroxywithanolide E (HWE), 3-Aziridinylwithaferin A (AzWA) and Withaperuvin (WP).

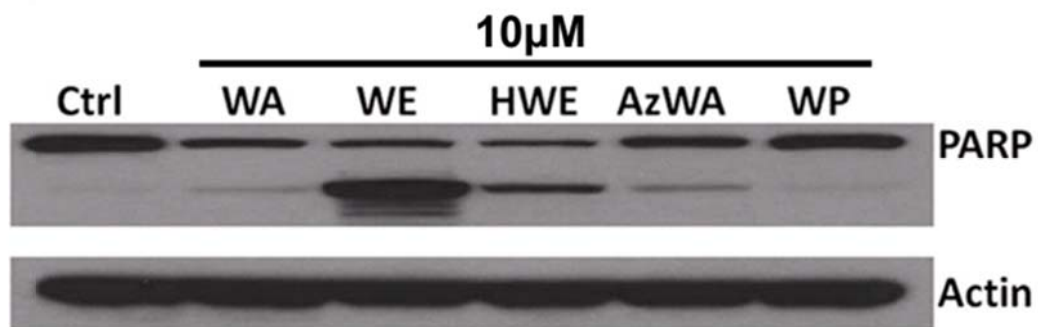

**S.2** PARP protein level in Panc-1 cells after 10µM WA, WE, HWE, AzWA or WP treatment for 24h. Equal amounts of protein (50 µg/lane) were subjected to SDS-PAGE and analyzed by Western blot with specific antibodies to PARP and Actin. Actin was served as internal standard. Results are representative of three independent experiments.

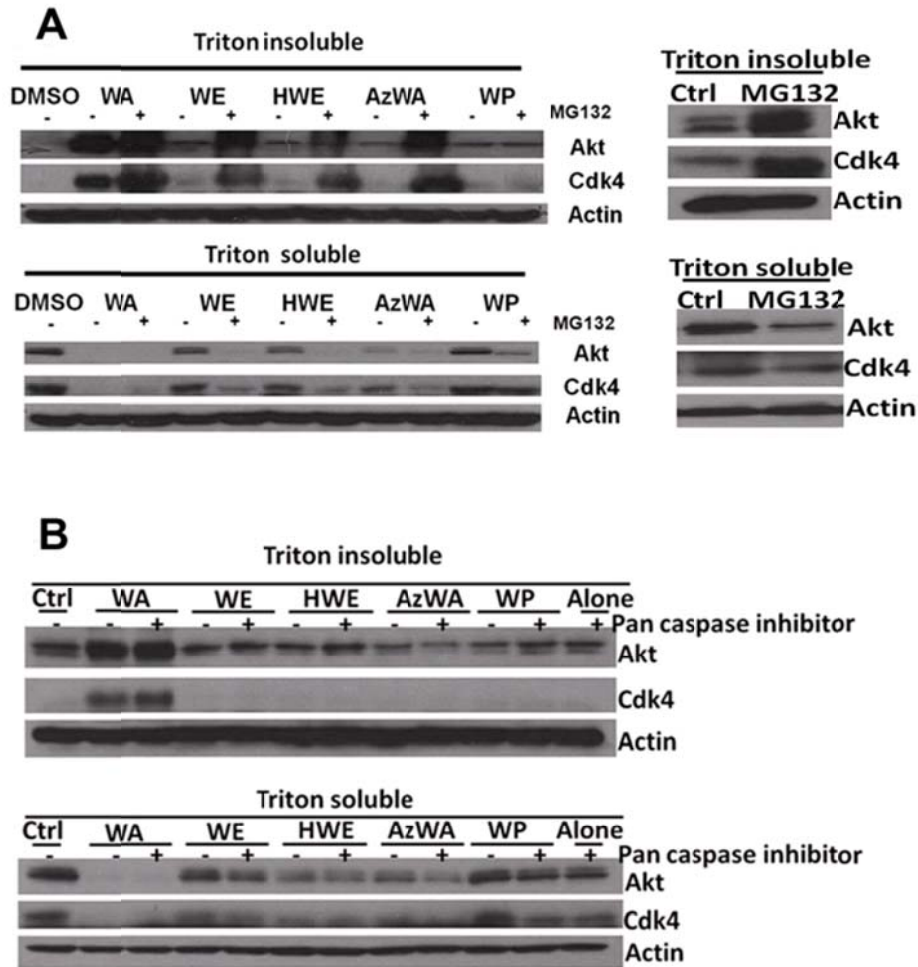

**S.3** WA and its analogues induced Hsp90 client protein degradation through proteasome-dependent pathway. Panc-1 cells were preincubated with 10 $\mu$ M MG132 (A) or Z-VAD-FMK for 1 h, respectively, and then were treated with 5 $\mu$ M WA, WE, HWE, AzWA and WP for another 24h. Cells were harvested and lysed in Triton X-100 buffer, and the Triton X-100-insoluble fraction was resolubilized in 2% SDS. Proteins (both triton-soluble and triton-insoluble parts) were subjected to Western blot analysis with specific antibodies to Akt, Cdk4 and Actin. Actin was served as internal standard. Results are representative of three independent experiments.
